# Supplementary material for: Understanding the blue-emitting orthoborate phosphor NaBaBO3:Ce3+ through experiment and computation
Source: Royal Society of Chemistry journal article supplement (doi:10.1039/c8tc05629c), 2018-12-18
Supplement: c8tc05629c1.pdf [file c8tc05629c1.pdf]

## Supporting Information

### Understanding the Blue-Emitting Orthoborate Phosphor $\text{NaBaBO}_3:\text{Ce}^{3+}$ through Experiment and Computation

Jiyou Zhong<sup>†‡</sup>, Weiren Zhao<sup>†\*</sup>, Ya Zhuo<sup>‡</sup>, Chunpei Yan<sup>§</sup>, Jun Wen<sup>†\*</sup>, and Jakoah Brgoch<sup>‡\*</sup>

<sup>†</sup>School of Physics and Optoelectronic Engineering, Guangdong University of Technology, Guangzhou 510006, China

<sup>‡</sup>Department of Chemistry, University of Houston, Houston, Texas 77204, United States

<sup>†</sup>School of Physics and Electronic Engineering, Anqing Normal University, Anqing 246133, China

<sup>§</sup>National Engineering Research Center for Rare Earth Materials, General Research Institute for Nonferrous Metals, and Griem Advanced Materials Co., Ltd., Beijing 100088, China

\*E-mail: zwren123@126.com; wenjunkd@mail.ustc.edu.cn; jbrgoch@uh.edu

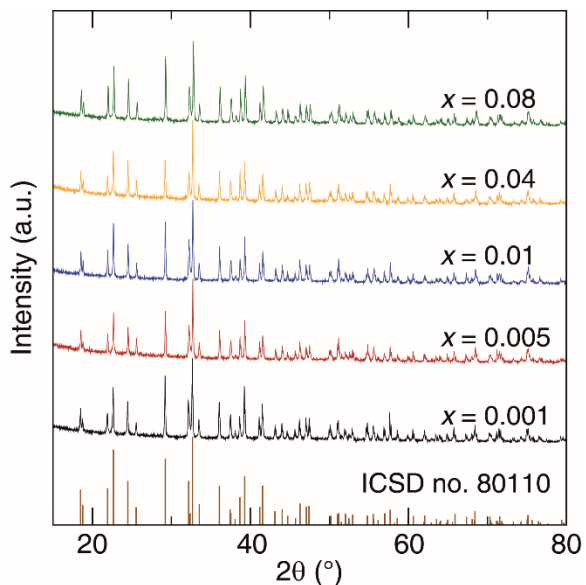

**Figure S1** The X-ray powder diffraction patterns of  $\text{Na}(\text{Ba}_{1-x}\text{Ce}_x)\text{BO}_3$  ( $x = 0.001, 0.005, 0.01, 0.04,$  and  $0.08$ ).

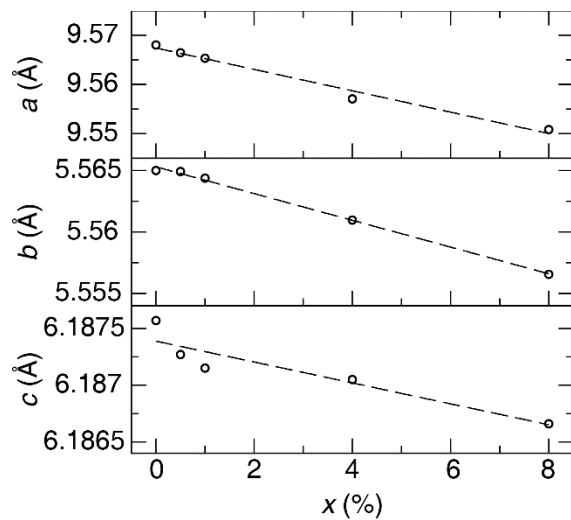

**Figure S2** Unit cell lattice parameters as a function of  $\text{Ce}^{3+}$  concentration.

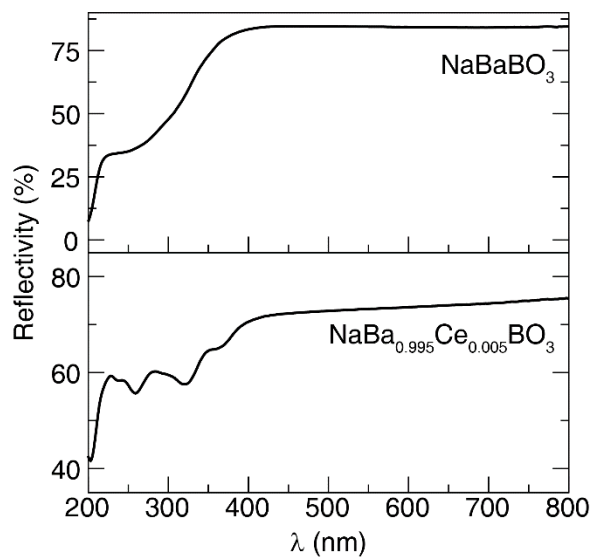

**Figure S3** The diffuse reflection spectrum of  $\text{NaBaBO}_3$  and  $\text{Na}(\text{Ba}_{0.995}\text{Ce}_{0.005})\text{BO}_3$ .

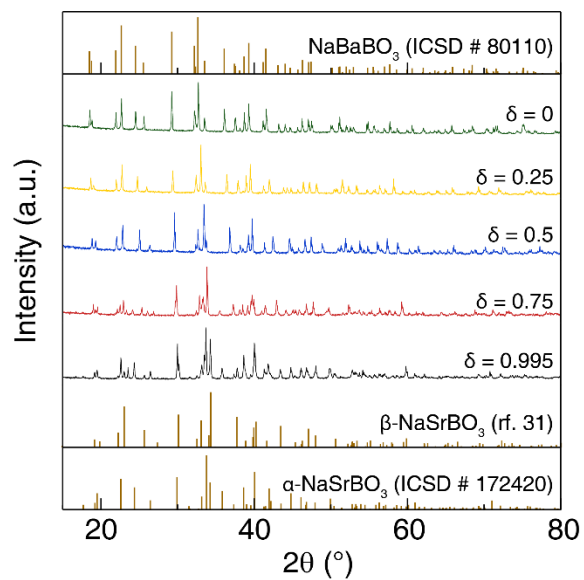

**Figure S4** The X-ray powder diffraction patterns of Na(Ba<sub>0.995-δ</sub>Sr<sub>δ</sub>)Ce<sub>0.005</sub>BO<sub>3</sub> (δ = 0, 0.25, 0.5, 0.75, and 1).

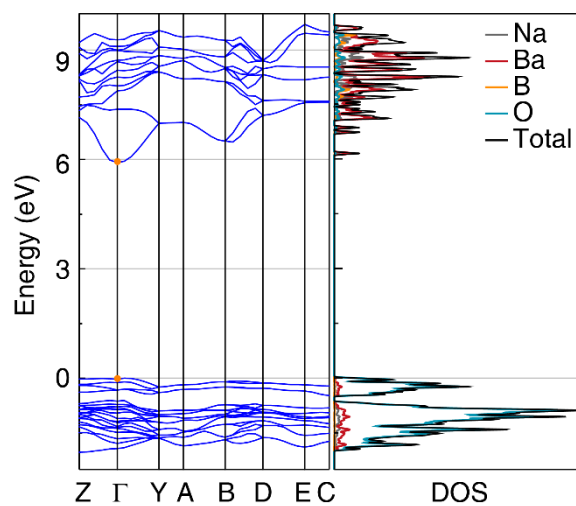

**Figure S5** The band structure and density of states DOSs of NaBaBO<sub>3</sub> with the PBE0 hybrid functional.

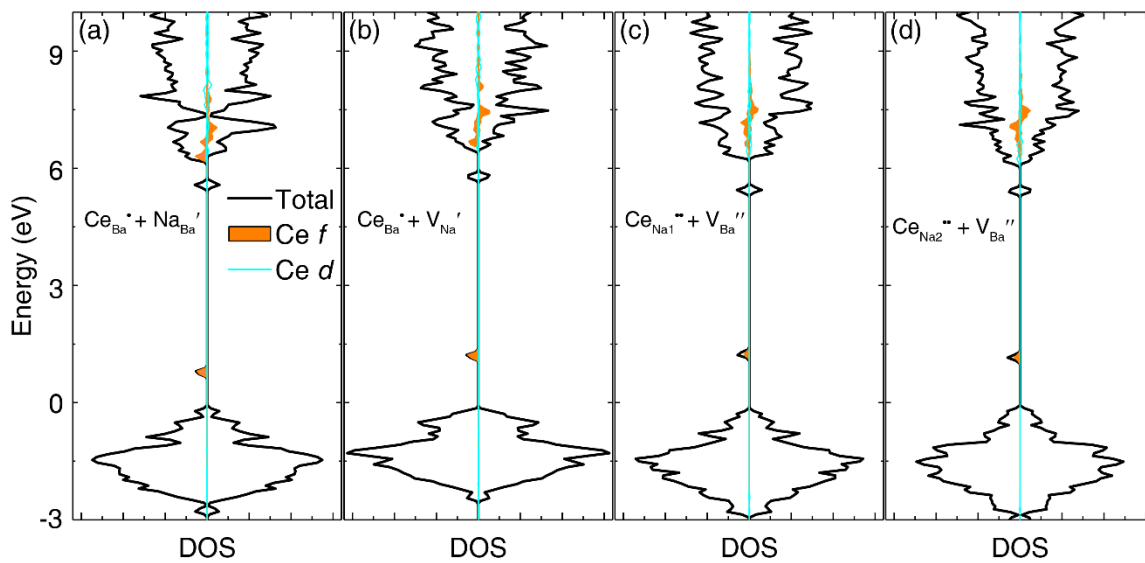

**Figure S6** Total and orbital-projected DOSs for a)  $\text{Ce}_{\text{Ba}}^{\bullet} + \text{Na}_{\text{Ba}}^{\cdot}$ , b)  $\text{Ce}_{\text{Ba}}^{\bullet} + \text{V}_{\text{Na}}^{\cdot}$ , c)  $\text{Ce}_{\text{Na1}}^{\bullet} + \text{V}_{\text{Ba}}^{\cdot\cdot}$ , d)  $\text{Ce}_{\text{Na2}}^{\bullet} + \text{V}_{\text{Ba}}^{\cdot\cdot}$  in the  $\text{NaBaBO}_3$  obtained from the standard DFT-PBE0 method.

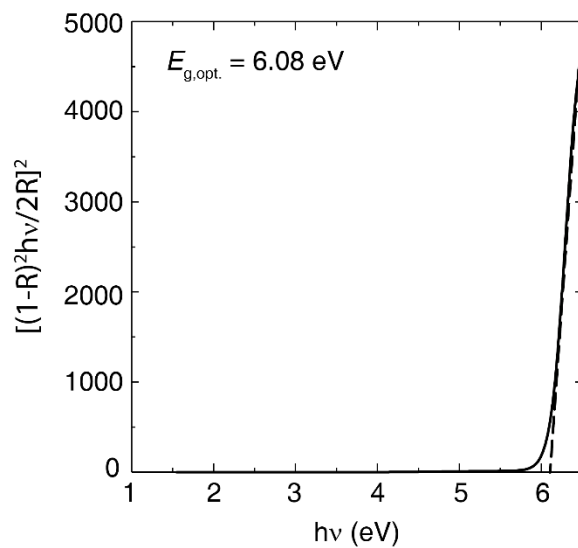

**Figure S7** The calculated optical band gap.
